# Supplementary material for: Plasma antioxidants and oxidative stress status in obese women: correlation with cardiopulmonary response
Source: PeerJ. 2020 May 19;8:e9230. doi: 10.7717/peerj.9230 (PMC7243812; doi:10.7717/peerj.9230)
Supplement: Supplemental Information 1 [file peerj-08-9230-s001.xlsx]

## Sheet: All data
Group	Age	Weight	Height	BMI	SMM	BFM	PBF	WHR	Exerdur	Vo2	Vo2peak	Mets	R	VE	BR	VT	Rf	Hrpeak	Vo2/HR	Qt	PetCo2	PetO2	Ve/Vo2	Ve/Vco2	ABTS	FRAP	ROS	MDA	CAT	GPX	SOD
1	28	50.5	151	22.1	18.6	15.4	30.5	0.81	9.3	1453	29.06	8.6	1.24	67.6	39	1.29	52.6	180	8.4	9.1	33	119	44.9	36.4	4.245	1150.94	364.965	1.178	14.408	40.751	2.476
1	33	49.3	152	21.4	17.2	16.7	34	0.84	8	972	19.44	5.3	1.18	33.1	69	0.76	43.4	164	5.7	5.9	40	110	35.6	31.6	4.292	1077.61	421.644	1.274	11.23	42.449	1.872
1	25	56.9	158	22.8	19.3	20.9	36.7	0.9	9.45	1370	24.04	6.9	1.26	59.3	60	1.22	48.7	192	7.2	8.5	35	119	42.8	34	3.918	739.833	557.408	0.748	9.775	28.016	5.459
1	40	51.7	152	22.4	18	17.8	34.4	0.85	6.3	973	19.46	5.5	1.19	41.5	58	1.11	37.5	161	6	6	31	119	43.3	37.8	4.486	942.056	415.292	1.622	13.722	39.053	4.229
1	35	52.3	153	22.3	17.1	19.8	37.8	0.9	5.3	783	25.18	4.3	1.48	45.2	58	1.12	40.4	165	4.8	4.9	30	125	999	38.2	4.719	893.722	529.533	1.21019	14.108	50.089	4.382
1	29	45.5	151	20	16.9	13.7	30.2	0.86	8.45	1080	23.13	6.5	1.37	51.6	53	1.18	43.8	164	6.5	6.6	31	122	48.5	36.5	4.457	497.611	603.358	1.148	10.683	43.298	9.989
1	26	45	154	19.1	15.7	15	33	0.84	7.3	1104	24.53	6.9	1.44	49.3	58	1.21	40.9	174	6.3	6.8	36	112	45.1	31.3	4.411	542.611	617.118	1.067	13.325	35.657	5.303
1	32	53.1	167	19.1	19.1	17.3	32.6	0.85	13	1380	25.99	6.9	1.18	39.4	70	0.85	46.4	164	7.8	8.3	44	106	30.7	27	4.365	667.611	416.573	0.97	14.4574	28.865	2.871
1	34	43.3	155	18	16.6	11.9	27.4	0.81	11	1353	31.25	9.3	1.3	60.1	46		47.5	162	8.7	8.4	32	118	42.8	37	3.868	472.056	389.559	0.978	17.253	50.938	3.595
1	20	45.9	156	18.9	20.5	8.8	19.2	0.77	11.5	1692	25.18	9.9	1.17	44.5	57	1.19	37.4	190	8.4	10.2	43	107	27.9	25.3	3.733	945.389	422.009	1.311	12.442	50.938	3.952
1	21	49.8	153	21.3	19.4	13.7	27.6	0.79	13.45	1265	25.4	5.7	1.17	27.8	72	0.6	46.5	162	6.1	7.1	45	106	28.1	24.9	4.161	717.611	461.419	1.21019	14.4574	44.996	3.689
1	23	52.7	156	21.7	18.3	18.5	35	0.86	11	1327	25.18	7.4	1.2	47.2	55	1.16	40.7	181	7.5	8.3	37	113	34.7	30.1	4.134	543.722	424.794	0.811	14.4574	62.824	4.24
1	21	46.1	159	18.2	19.2	10.4	22.5	0.76	12	1290	27.98	7.8	1.32	46.3	57	0.97	47.8	181	6.9	7.9	38	106	37.1	30.5	3.177	482.611	372.612	0.815	13.629	41.6	2.682
1	21	50.3	163	18.9	18.7	15.1	30	0.86	9.1	768	25.18	4.4	1.29	28.9	75	0.69	41.8	172	4.5	4.8	36	115	37.1	31.1	3.406	525.944	357.874	1.289	12.234	49.24	3.256
1	19	46	152	19.9	15.8	15.8	34.2	0.8	8	1129	24.54	7.3	1.22	43.2	56	0.82	53	182	6.5	7.1	38	114	36.7	30	3.786	718.722	382.719	1.21019	13.516	67.069	3.018
1	19	49.9	159	19.8	18.4	15.2	30.4	0.77	10	1166	23.37	5.9	1.34	36.7	66	0.9	40.9	170	6	6.9	39	113	35.8	29.3	3.906	512.611	398.598	1.2	13.799	51.787	5.406
1	31	46.5	160	18.2	20.9	9.3	20	0.66	9.45	1088	23.4	6.7	1.17	41.3	66	0.97	42.4	165	6.9	6.8	39	113	36.4	29.5	2.96	438.722	428.339	1.033	11.138	44.147	4.789
1	31	48.2	154	20.3	19.6	12	24.9	0.79	11	1295	26.87	7.8	1.31	47.2	58	1.07	44	165	8	8	40	113	36	28.3	3.934	859.278	393.74	1.233	10.993	67.918	2.864
1	29	50.2	154	21.1	18.1	16.2	32.4	0.81	12.45	1486	29.6	8.2	1.27	58.9	48	0.93	63.2	177	8.2	9.1	35	117	40.8	33.1	4.007	504.278	376.5	1.489	12.798	50.089	4.115
1	23	62.7	167	22.5	25.2	17.2	27.4	0.82	13	1758	28.04	8.4	1.21	68.1	43	1.02	66.6	170	10.8	11	37	113	37	34.3	3.148	622.611	406.397	0.659	14.454	54.334	4.589
1	20	46.6	155	19.4	14.7	17.9	38.3	0.84	8.45	1091	23.36	6.6	1.22	41.6	60	0.91	45.9	176	6.1	6.7	35	116	38.9	32.7	3.707	749.833	432.149	1.015	10.032	36.506	4.015
1	20	47.6	144	22.9	18.6	13.3	27.9	0.78	13	1346	27.7	7.7	1.15	41.7	52	0.95	43.9	174	7.5	8.2	39	111	31.9	30	3.929	496.5	504.475	1.363	11.347	44.147	3.069
1	20	41.3	148	18.9	15.6	11.4	27.6	0.77	11	1547	25.18	10.5	1.29	59.5	36	1.16	51.3	193	8	9.5	36	117	38.6	31.2	3.984	330.944	549.853	1.096	14.4574	41.6	3.72944
2	25	51.7	146	24.3	16.9	19.8	38.4	0.86	7.3	1204	23.61	6.8	1.07	45.1	58	0.98	46	169	7.2	7.5	34	115	36.9	34.3	4.091	591.5	349.884	1.341	14.792	21.224	2.119
2	27	69.5	163.5	26	23.7	26.1	37.6	0.97	8.15	1704	25.43	7.6	1.23	87.3	34	1.93	45.2	188	9.5	10.7	27	123	48.9	41.7	3.599	682.611	329.069	1.474	16.246	44.147	1.821
2	25	67.9	161	26.2	21.5	27.9	41.1	0.89	9	1418	20.88	5.9	1.27	53.6	58	1	53.5	180	7.8	8.7	36	117	38.4	30.6	4.043	710.944	423.301	1.681	13.729	44.996	3.6
2	27	55.5	151	24.3	18.6	20.6	37.1	0.81	6.3	1426	25.69	7.4	1.3	65.1	42	1.15	56.6	180	7.9	8.8	32	122	45.5	35	4.088	793.167	374.601	1.341	15.2	56.881	1.78
2	34	58.6	147	27.1	17.1	26.2	44.7	0.85	6.45	1171	19.75	5.6	1.15	41.4	58	1.19	34.7	165	7	7.2	36	115	35.6	32.9	3.441	724.833	424.794	1.089	14.4574	66.22	7.78
2	35	55.4	150	24.6	19	19.9	35.9	0.88	6.14	1100	20	5.3	1.27	42.3	58	1.04	40.8	148	9.6	6.6	33	119	41.5	34.9	3.888	842.056	303.521	1.207	8.622	44.996	4.433
2	34	64.3	157	26.1	21.1	25.2	39.2	0.88	10.15	1378	24.61	6.4	1.17	49	58	1.14	43.1	169	8.5	8.6	44	111	34.2	26.5	4.029	737.611	329.247	0.904	10.12	30.563	2.897
2	55	59.9	154	25.3	20.3	22.2	37.1	0.85	10	1517	26.25	7.2	1.28	43.3	52	1.26	34.3	162	9	9.2	46	105	29.6	25.3	3.809	922.056	305.478	1.015	8.612	34.808	1.708
2	30	69.9	166	25.4	25	24.3	34.8	0.96	8	1306	18.93	5.6	1.24	39	70	1.31	29.8	154	8.8	8.2	42	108	28.8	26.1	3.805	643.167	444.881	1.259	16.124	47.542	6.597
2	33	55.2	147	25.5	17.4	22.8	41.3	0.86	10	1339	24.35	7.1	1.06	43.5	57	1.15	37.8	163	8.4	8.3	39	109	31.9	30.2	3.41	1012.61	515.81	1.126	16.916	50.938	5.368
2	33	64.6	155	26.9	21.6	24.5	38	0.9	13	1894	28.7	7.9	1.21	54	51	1.38	39.2	152	12	11.5	45	107	29.7	25.2	3.995	727.056	431.886	1.652	12.9	49.24	3.05
2	49	62.6	152	27.1	17.9	28.9	46.2	0.91	7.3	1159	18.51	5.4	1.21	43.8	52	1.01	43.6	171	6.9	7.2	40	112	36.9	30.6	3.73	938.167	424.794	1.733	14.845	70.465	3.55
2	33	64.3	163	24.2	21.8	23.6	36.7	0.9	9.15	1281	20.02	5.6	1.33	45.3	63	1.12	40.5	163	7.7	7.9	38	113	36	31.2	3.661	684.833	379.781	1.03	18.353	50.938	4.085
2	31	54.1	149	24.4	19.3	18.7	34.5	0.83	10	1511	27.98	8.2	1.07	46.4	55	0.91	51.3	157	9.9	9.4	42	107	29.9	28	3.589	876.5	435.3	0.978	14.4574	39.053	4.031
2	50	71.2	163	26.8	25	25.6	35.9	0.91	11.15	1381	19.73	5.6	1.15	45.4	58	1.1	41.2	176	7.7	8.5	40	111	33.3	29.3	3.723	725.389	492.493	1.322	17.701	44.996	3.044
2	40	59.6	159	23.6	18.6	24.2	40.6	0.91	8	1241	20.34	6.3	1.33	65	42	1.33	48.9	166	8.1	7.9	31	120	48.6	37.3	3.85	969.833	424.794	1.21019	17.433	58.579	3.173
2	48	61.3	152	26.5	19.4	24.9	40.5	0.89	7	1135	18.76	5.5	1.21	41.5	55	1.29	32.3	178	12.8	7.1	37	114	35.7	29.6	3.613	481.5	403.248	1.389	20.937	40.751	3.904
2	52	57.6	146	27	11.6	35.1	59.4	0.9	6.15	1098	19.61	5.2	1.13	39.7	54	0.77	51.9	134	7.7	6.6	33	116	38.7	34.3	3.446	630.389	387.902	1.633	12.719	56.881	3.083
2	26	55.9	152	24.2	18.1	21.8	39	0.82	10	1493	26.66	7.6	1.23	67.1	42	1.26	53.3	168	8.9	9.2	32	120	44.9	37.3	2.652	631.5	382.201	1.233	14.084	35.657	3.282
2	42	55.9	154	23.6	20.4	18.2	32.5	0.88	9.45	1491	27.11	7.9	1.33	64.4	37	1.3	49.5	170	9	9.3	35	118	42.2	33.8	2.993	699.833	399.635	1.304	12.409	49.24	5.104
2	46	53.6	147	24.8	18.7	19	35.4	0.87	6.15	1241	23.42	7	1.21	47	54	1.06	44.5	147	8.8	7.8	38	114	36.4	31.5	3.282	615.389	415.346	1.096	22.701	60.277	3.593
2	25	59.5	154	25.1	20.9	21.1	35.7	0.86	9.45	1209	20.32	6	1.47	66.4	44	1.2	55.5	190	6.6	7.6	31	123	52.8	37.8	3.264	752.056	389.327	1.304	12.189	49.24	3.156
2	22	54.3	152	23.5	20.3	16.9	31.1	0.82	11.45	1573	29.68	8.6	1.26	52.2	47	0.98	31.9	189	8.4	9.7	43	111	32.8	26.1	3.192	705.389	424.794	1.467	15.678	49.24	4.217
2	40	75.5	166	27.4	27.1	26.3	34.9	0.9	14	1634	21.64	6	1.14	54.6	55	1.19	45.8	145	10.9	9.9	36	113	34.6	31.5	3.162	568.722	454.369	0.822	16.396	69.616	4.134
2	23	55.8	155	23.2	22.3	15.7	28.1	0.82	14	1934	34.66	10.1	1.21	68.5	44	1.31	52.2	166	11.9	12	38	112	34.7	30.8	3.055	462.611	365.065	1.237	12.172	45.845	3.639
2	21	63.3	164	23.5	28.4	12.7	30	0.78	999	1769	29.48	8.1	1.09	49.2	58	1.25	39.3	153	11.1	10.8	40	107	28.9	28.8	3.344	273.167	344.441	0.689	13.765	42.449	3.117
2	19	55.4	152	24	18.6	20.2	36.4	0.84	9.45	1110	20.04	5.4	1.29	41.5	58	0.84	49.4	181	5.8	6.7	36	117	39.4	31.1	2.82	440.389	391.588	0.867	16.764	53.485	4.892
2	19	60.6	158.5	24.1	19.7	23.9	39.5	0.9	9.3	1231	20.31	5.6	1.36	49.8	54	0.96	51.9	165	7.2	7.5	35	117	41.7	33.8	3.468	554.278	530.616	1.363	13.531	54.334	4.676
3	47	85.6	157	34.7	25.9	38.4	44.9	0.99	11.45	1880	22.12	6.4	1.15	58.9	41	1.68	35	148	12.9	11.7	41	109	30.8	27.4	3.692	522.611	492.277	0.933	14.608	73.012	1.793
3	38	91.4	161	35.5	24.6	46.5	50.9	1.01	8	1120	12.5	5.3	1.34	37.4	66	0.66	56.4	164	6.5	6.8	42	112	35.2	27.5	3.489	654.833	501.492	1.533	17.544	53.485	2.004
3	46	73.7	152	31.9	21.1	35.1	47.5	0.92	9	1100	15.71	4.3	1.02	32.6	66	0.9	36.3	999	8.7	6.7	37	110	31.1	31	3.721	456.5	388.333	1.541	14.4574	31.412	2.497
3	34	92.3	157	37.4	26.1	44.9	48.6	0.97	8	1264	13.31	4.1	1.08	39.6	65	0.98	40.3	164	8.2	8	39	109	29.3	27.8	3.881	663.722	365.363	1.467	19.568	56.881	2.245
3	25	63.6	151	27.9	20.4	25.8	40.6	0.86	8.3	1603	25.05	5.3	1.28	59.2	48	0.9	65.6	180	9	9.9	40	114	36.4	29.3	3.65	524.278	432.433	1.422	19.308	47.542	2.154
3	55	73.6	156	30.3	21.6	33.1	45	0.91	7.3	734	19.14	5.3	1.52	37.8	60	0.74	51.3	154	4.5	4.4	33	123	54.6	36	3.465	549.278	484.154	1.296	21.183	51.787	2.149
3	33	66	156	27.1	21.8	25.9	39.3	0.93	8.15	1178	17.32	5.1	1.32	54.8	52	0.94	58.3	176	7	7.4	35	119	44.8	33.9	3.618	705.944	377.925	1.141	18.576	65.371	2.165
3	34	73.4	155	30.5	23	31.3	42.6	0.87	9.3	1457	19.69	5.8	1.11	49.3	55	1.35	36.6	167	9	9.1	36	113	32.9	31.7	3.351	1038.17	401.757	0.815	18.556	44.996	2.378
3	35	92.7	161	35.7	29.6	39.5	42.6	1.04	8.3	1556	16.91	4.6	1.08	42.1	65	1.29	32.7	999	11	9.4	42	107	28.6	27.5	3.768	674.833	356.162	1.281	15.925	39.902	2.637
3	37	73.1	150	32.5	18.2	38.9	53.2	0.99	6.45	1259	17.49	5.1	1.16	47.9	52	1.08	44.2	176	7.3	7.8	34	117	37.4	34.2	3.945	645.944	347.895	1.267	12.109	39.902	1.57
3	42	66.8	152	28.9	21.5	27.3	40.9	0.91	9	1325	19.78	5.9	1.15	48	51	1.14	42	166	8.3	8.3	40	113	35	30.4	4.14	284.278	368.829	1.133	10.438	46.693	1.735
3	43	67.8	153	28.9	23.4	24.7	36.4	0.85	10	1416	21.13	6	1.17	62.2	41	1.48	42	166	8.5	8.7	31	120	43.9	38.1	4.126	564.833	394.62	1.319	16.085	39.902	3.111
3	43	68.3	144	32.8	22.8	27.4	40.2	0.81	8	1257	18.49	5.2	1.34	52.5	42	1.01	51.9	168	7.3	7.7	33	118	42.6	35.8	3.061	875.389	335.051	1.141	12.061	27.167	1.871
3	35	75.1	156	30.8	23	33	43.9	0.81	7.15	1347	18.71	5.4	1.05	44.8	60	1.16	38.5	154	8.8	8.3	38	110	33	31.7	2.971	502.056	425.693	1.148	15.224	28.865	8.203
3	31	71.8	160	28.1	23.4	28.7	40	0.89	10	1426	19.86	5.4	1.23	57.3	53	1.37	41.9	156	8.7	8.6	35	117	42.2	35.2	4.007	480.389	387.806	1.096	11.842	50.089	2.821
3	36	61.1	148	27.9	20.5	23.4	38.2	0.84	9.15	1246	27.09	5.3	1.35	59.3	40	1.07	55.4	171	7.4	7.7	33	120	46.9	36.6	3.685	282.611	508.452	1.319	9.967	73.012	2.947
3	31	72.8	156	29.9	21.9	32.6	44.8	0.94	11	1247	17.08	5	1.25	41.5	65	0.87	47.9	167	7.6	7.7	42	110	32.7	27.3	3.62	475.944	424.794	1.2	13.135	34.808	4.715
3	47	64.6	152	28	18.9	28.8	44.6	0.9	10	1208	18.58	5.3	1.32	61.2	37	1.41	43.4	161	7.6	7.5	32	120	50.4	38.2	4.408	436.5	513.547	1.356	16.504	39.053	5.3
3	33	85.7	159	33.9	23.3	43	50.1	1.02	11.3	1663	19.56	5.3	1.2	61.9	48	1.16	53.3	164	9.6	10.1	37	115	39.2	32.6	3.541	392.611	387.806	1.2	10.327	36.506	3.875
3	42	61.9	147	28.6	18.1	28.1	45.3	0.91	8	1157	18.66	5.3	1.3	43.7	53	0.92	47.5	176	6.5	7.1	38	114	38.1	30.2	3.76	324.278	458.601	0.793	18.803	42.449	4.582
3	33	73.3	162	27.9	23.1	30.8	42.1	0.96	10.3	1560	21.97	6.5	1.25	57.1	54	1.32	43.4	167	9.7	9.7	40	112	35.4	31.2	3.999	394.833	536.327	1.21019	14.4574	45.845	4.51
3	26	67.2	153.5	28.5	21.5	27.3	40.6	0.89	9.45	1559	23.98	6.9	1.13	52.3	56	1.1	47.7	171	9.2	9.6	40	111	33.4	30.2	3.417	738.722	539.377	1.437	14.4574	76.408	4.659
3	45	88.5	160	34.6	23.6	45.1	50.9	1.02	9.45	1476	16.77	4.9	1.24	55	49	1.08	51.2	159	9.4	9.2	39	114	36.7	31.1	3.354	682.056	467.783	1.059	14.4574	52.636	3.157
3	38	68.9	152	29.8	22.8	27.1	39.3	0.91	10	1336	19.65	5.7	1.13	61.7	40	1.06	58.4	172	7.9	8.3	34	120	45.2	35.8	3.406	432.611	438.681	1.5	14.222	44.996	4.562
3	30	77.2	162	29.4	28	26.3	34.1	0.85	9.07	1929	24.99	6.3	1.19	47.6	62	1.33	35.9	159	10.7	11.4	47	103	28	25.3	3.494	500.389	425.522	1.5	14.219	50.938	3.098
3	39	70.4	156	28.9	21.2	31.2	44.3	0.94	9.15	1555	21.63	5.2	1.12	41.4	63	1.43	29	147	10.9	9.7	42	104	25.9	26.1	3.623	171.5	424.794	1.544	16.238	43.298	5.899
3	29	65.4	152	28.3	18.8	30.3	46.3	0.84	7.3	1112	17.65	5.1	1.3	52.8	53	0.89	59.5	175	6.4	6.9	31	120	46.9	37.9	4.021	438.722	424.794	1.193	23.413	65.371	4.804
3	33	80.5	153	34.4	23	38.6	47.9	0.9	10.45	1744	21.66	6.2	1.22	58.4	47	1.69	34.6	173	10	10.7	39	112	33.6	28.5	3.487	393.722	424.794	1.156	13.091	45.845	4.024
3	30	85	150	37.8	22.7	43.5	51.2	0.9	10	1461	17.19	5.1	1.3	59.8	44	1.02	58.9	173	8.7	9.1	35	116	39.7	32.4	3.513	465.389	443.387	1.119	13.245	61.126	3.468
